# Supplementary figures and images for: Combining a PI3K Inhibitor with a PARP Inhibitor Provides an Effective Therapy for BRCA1-Related Breast Cancer
Source: Oxford University Press journal article supplement (doi:10.1158/2159-8290.cd-11-0336), 2012-08-22

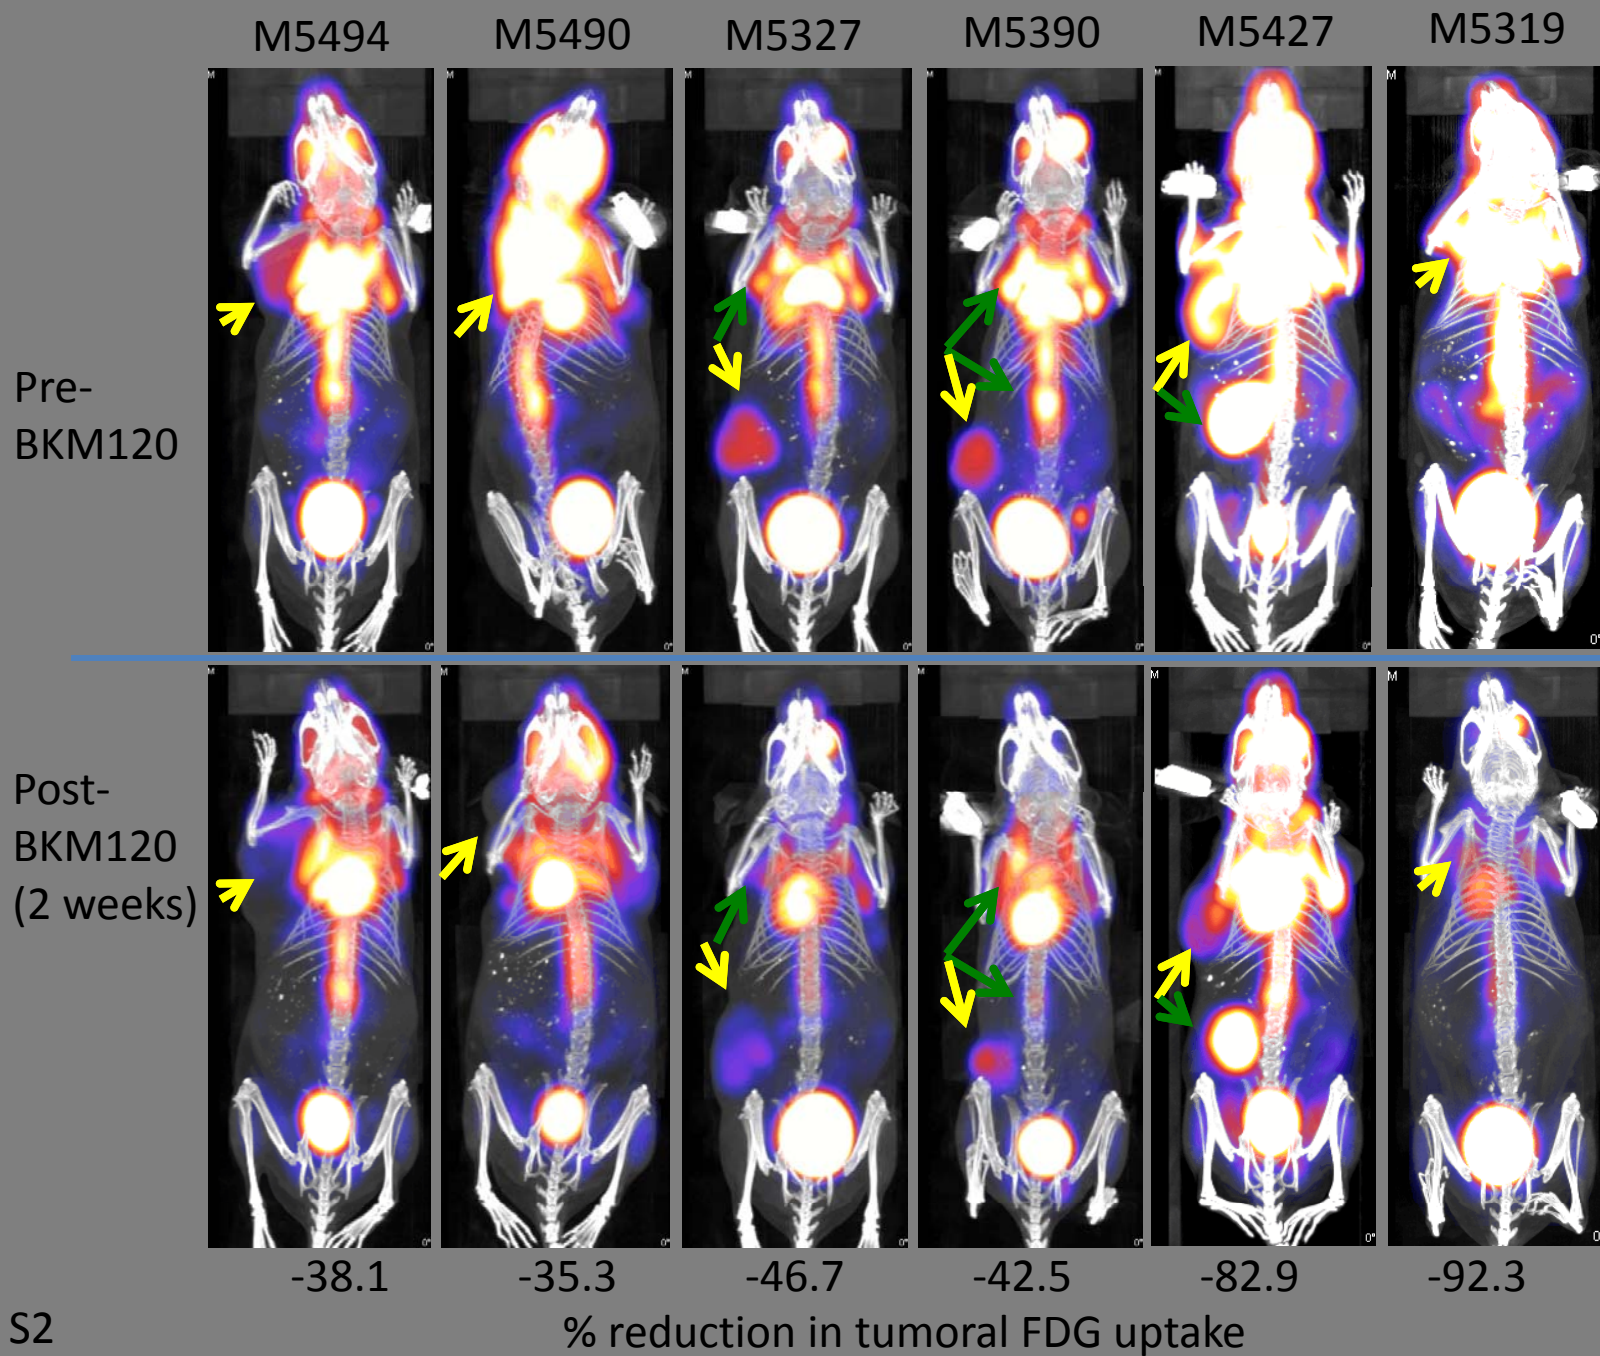

Fig. S2

Supplement: 21598290cd110336-sup-f2_526k.pdf [file 21598290cd110336-sup-f2_526k.pdf]
